# Supplementary material for: Biomarkers in Neuropsychiatric Systemic Lupus Erythematosus: A Systematic Literature Review of the Last Decade
Source: MDPI journal article supplement (doi:10.3390/brainsci12020192), 2022-01-30
Supplement: s1 [file s1]

**Table S1.** Search in the Medline

| Interface: Ovid MEDLINE(R) and Epub Ahead of Print, In-Process & Other Non-Indexed Citations and Daily<br><br>Date of Search: 7 December 2021<br><br>Number of hits: 1799<br><br>Comment: In Ovid, two or more words are automatically searched as phrases; i.e. no quotation marks are needed |                                                                                                                                                                        | Field labels <ul style="list-style-type: none"> <li>• exp/ = exploded MeSH term</li> <li>• / = non exploded MeSH term</li> <li>• .ti,ab,kf. = title, abstract and author keywords</li> <li>• adjx = within x words, regardless of order</li> <li>• * = truncation of word for alternate endings</li> </ul> |                                                                                                                                                                                                                                                                                                         |
|------------------------------------------------------------------------------------------------------------------------------------------------------------------------------------------------------------------------------------------------------------------------------------------------|------------------------------------------------------------------------------------------------------------------------------------------------------------------------|------------------------------------------------------------------------------------------------------------------------------------------------------------------------------------------------------------------------------------------------------------------------------------------------------------|---------------------------------------------------------------------------------------------------------------------------------------------------------------------------------------------------------------------------------------------------------------------------------------------------------|
| #                                                                                                                                                                                                                                                                                              | Query                                                                                                                                                                  | Hits                                                                                                                                                                                                                                                                                                       | Comments                                                                                                                                                                                                                                                                                                |
| <b>Block 1: SLE</b>                                                                                                                                                                                                                                                                            |                                                                                                                                                                        |                                                                                                                                                                                                                                                                                                            |                                                                                                                                                                                                                                                                                                         |
| 1                                                                                                                                                                                                                                                                                              | exp Lupus Vasculitis, Central Nervous System/                                                                                                                          | 903                                                                                                                                                                                                                                                                                                        |                                                                                                                                                                                                                                                                                                         |
| 2                                                                                                                                                                                                                                                                                              | lupus.jw.                                                                                                                                                              | 5,982                                                                                                                                                                                                                                                                                                      | Journal dedicated to SLE.                                                                                                                                                                                                                                                                               |
| 3                                                                                                                                                                                                                                                                                              | (lupus adj3 (auto-immun* or autoimmun* or disseminat* or erythemat* or nephriti* or neuropsych* or neuro-psych* or systemic*).ti,ab,kf.                                | 66,944                                                                                                                                                                                                                                                                                                     | Terms chosen from MeSH (incl entry terms).                                                                                                                                                                                                                                                              |
| 4                                                                                                                                                                                                                                                                                              | (SLE and lupus).ti,ab,kf.                                                                                                                                              | 32,477                                                                                                                                                                                                                                                                                                     | Both SLE and lupus can be interpreted otherwise. Thus, combination was chosen.                                                                                                                                                                                                                          |
| 5                                                                                                                                                                                                                                                                                              | or/1-4                                                                                                                                                                 | 69,505                                                                                                                                                                                                                                                                                                     |                                                                                                                                                                                                                                                                                                         |
| <b>Block 2: Biomarkers</b>                                                                                                                                                                                                                                                                     |                                                                                                                                                                        |                                                                                                                                                                                                                                                                                                            |                                                                                                                                                                                                                                                                                                         |
| 6                                                                                                                                                                                                                                                                                              | exp Biomarkers/                                                                                                                                                        | 818,536                                                                                                                                                                                                                                                                                                    | Includes the following narrower terms: "Antibodies, Antineutrophil Cytoplasmic", "Antigens, Differentiation", "Biomarkers, Pharmacological", "Biomarkers, Tumor", "Chorionic Gonadotropin, beta Subunit, Human", "Environmental Biomarkers", "Fibrinopeptide A", "Genetic Markers", "Oligoclonal Bands" |
| 7                                                                                                                                                                                                                                                                                              | (biomarker* or marker*).jw.                                                                                                                                            | 20,588                                                                                                                                                                                                                                                                                                     |                                                                                                                                                                                                                                                                                                         |
| 8                                                                                                                                                                                                                                                                                              | (biomarker* or biological marker* or diagnostic marker*).ti,ab,kf.                                                                                                     | 352,017                                                                                                                                                                                                                                                                                                    | Biological and diagnostic causes too much noise with ADJx.                                                                                                                                                                                                                                              |
| 9                                                                                                                                                                                                                                                                                              | ((immunol* or metabol* or molecular* or novel) adj3 marker*).ti,ab,kf.                                                                                                 | 57,773                                                                                                                                                                                                                                                                                                     | ADJ3 reasonable, since more than two words in between gives much noise.                                                                                                                                                                                                                                 |
| 10                                                                                                                                                                                                                                                                                             | ((blood or cerebrospinal or plasma or sera or serologic* or serum or urinary or urine) adj3 marker*).ti,ab,kf.                                                         | 39,363                                                                                                                                                                                                                                                                                                     | Terms for where markers may be found. See #9.                                                                                                                                                                                                                                                           |
| 11                                                                                                                                                                                                                                                                                             | ((antibod* or antigen* or autoantibod* or cytokine* or glycoprotein* or immunoglob* or lectin* or lipoprotein* or peptide* or protein* or RNA) adj3 marker*).ti,ab,kf. | 34,682                                                                                                                                                                                                                                                                                                     | Terms for substances commonly occurring as biomarkers. See #9.                                                                                                                                                                                                                                          |
| 12                                                                                                                                                                                                                                                                                             | or/6-11                                                                                                                                                                | 1,100,776                                                                                                                                                                                                                                                                                                  |                                                                                                                                                                                                                                                                                                         |
| 13                                                                                                                                                                                                                                                                                             | exp Peptides/                                                                                                                                                          | 2,863,960                                                                                                                                                                                                                                                                                                  | MeSH-terms for substances occurring as biomarkers, to be                                                                                                                                                                                                                                                |
| 14                                                                                                                                                                                                                                                                                             | exp Blood Proteins/                                                                                                                                                    | 1,684,860                                                                                                                                                                                                                                                                                                  |                                                                                                                                                                                                                                                                                                         |

|                                           |                                                                                                                                                                                                                                                                                                      |           |                                                                                                                                        |
|-------------------------------------------|------------------------------------------------------------------------------------------------------------------------------------------------------------------------------------------------------------------------------------------------------------------------------------------------------|-----------|----------------------------------------------------------------------------------------------------------------------------------------|
| 15                                        | exp Membrane Proteins/                                                                                                                                                                                                                                                                               | 2,006,797 | combined with free-text word marker*.<br><br>Terms included if giving > 10 hits in combination with block 1 and MeSH-term Biomarkers/. |
| 16                                        | exp Carrier Proteins/                                                                                                                                                                                                                                                                                | 1,230,856 |                                                                                                                                        |
| 17                                        | exp Glycoproteins/                                                                                                                                                                                                                                                                                   | 877,057   |                                                                                                                                        |
| 18                                        | exp Lipoproteins/                                                                                                                                                                                                                                                                                    | 153,035   |                                                                                                                                        |
| 19                                        | exp DNA-Binding Proteins/                                                                                                                                                                                                                                                                            | 590,421   |                                                                                                                                        |
| 20                                        | exp Cytoskeletal Proteins/                                                                                                                                                                                                                                                                           | 297,813   |                                                                                                                                        |
| 21                                        | exp "Receptors, Cytoplasmic and Nuclear"/                                                                                                                                                                                                                                                            | 169,181   |                                                                                                                                        |
| 22                                        | exp Lectins/                                                                                                                                                                                                                                                                                         | 115,752   |                                                                                                                                        |
| 23                                        | or/13-22                                                                                                                                                                                                                                                                                             | 5,985,307 |                                                                                                                                        |
| 24                                        | marker*.ti,ab,kf.                                                                                                                                                                                                                                                                                    | 838,081   |                                                                                                                                        |
| 25                                        | 23 AND 24                                                                                                                                                                                                                                                                                            | 352,958   |                                                                                                                                        |
| 26                                        | 12 or 25                                                                                                                                                                                                                                                                                             | 1,272,019 |                                                                                                                                        |
| <b>Block 3: Study types for exclusion</b> |                                                                                                                                                                                                                                                                                                      |           |                                                                                                                                        |
| 27                                        | exp Animals/ not Humans/                                                                                                                                                                                                                                                                             | 4,924,285 | Based on a filter from McGill University.                                                                                              |
| 28                                        | exp Models, Animal/ not Humans/                                                                                                                                                                                                                                                                      | 422,080   |                                                                                                                                        |
| 29                                        | exp Animal Experimentation/ not Humans/                                                                                                                                                                                                                                                              | 5,691     |                                                                                                                                        |
| 30                                        | (animal or animals or canine or dog or dogs or feline or hamster or hamsters or lamb or lambs or mice or monkey or monkeys or mouse or murine or pig or pigs or piglet* or porcine or primate or primates or rabbit or rabbits or rat or rats or rodent* or sheep or sheeps or veterinar*).ti,kf,jw. | 2,544,152 |                                                                                                                                        |
| 31                                        | or/27-30                                                                                                                                                                                                                                                                                             | 5,431,043 |                                                                                                                                        |
| 32                                        | case reports.pt.                                                                                                                                                                                                                                                                                     | 2,230,033 |                                                                                                                                        |
| 33                                        | case.jw.                                                                                                                                                                                                                                                                                             | 113,552   |                                                                                                                                        |
| 34                                        | (case adj (report* or series or stud*)).ti,kf.                                                                                                                                                                                                                                                       | 391,780   | ADJ1 (or more) include case-control studies.                                                                                           |
| 35                                        | or/33-34                                                                                                                                                                                                                                                                                             | 477,444   |                                                                                                                                        |
| 36                                        | 31 OR 35                                                                                                                                                                                                                                                                                             | 5,902,092 |                                                                                                                                        |
| <b>Result: Biomarkers in SLE</b>          |                                                                                                                                                                                                                                                                                                      |           |                                                                                                                                        |
| 37                                        | (5 and 26) not 36                                                                                                                                                                                                                                                                                    | 6,820     |                                                                                                                                        |
| 38                                        | limit 37 to (yr="2012 -Current" and "all adult (19 plus years)" and english)                                                                                                                                                                                                                         | 1,800     | Limits based on exclusion criteria.                                                                                                    |
