# Supplementary material for: Biomarkers in Neuropsychiatric Systemic Lupus Erythematosus: A Systematic Literature Review of the Last Decade
Source: MDPI journal article supplement (doi:10.3390/brainsci12020192), 2022-01-30
Supplement: s1 [file s1]

**Figure S1.** PRISMA 2020 flow diagram for new systematic reviews which included searches of databases and registers only<sup>1</sup>

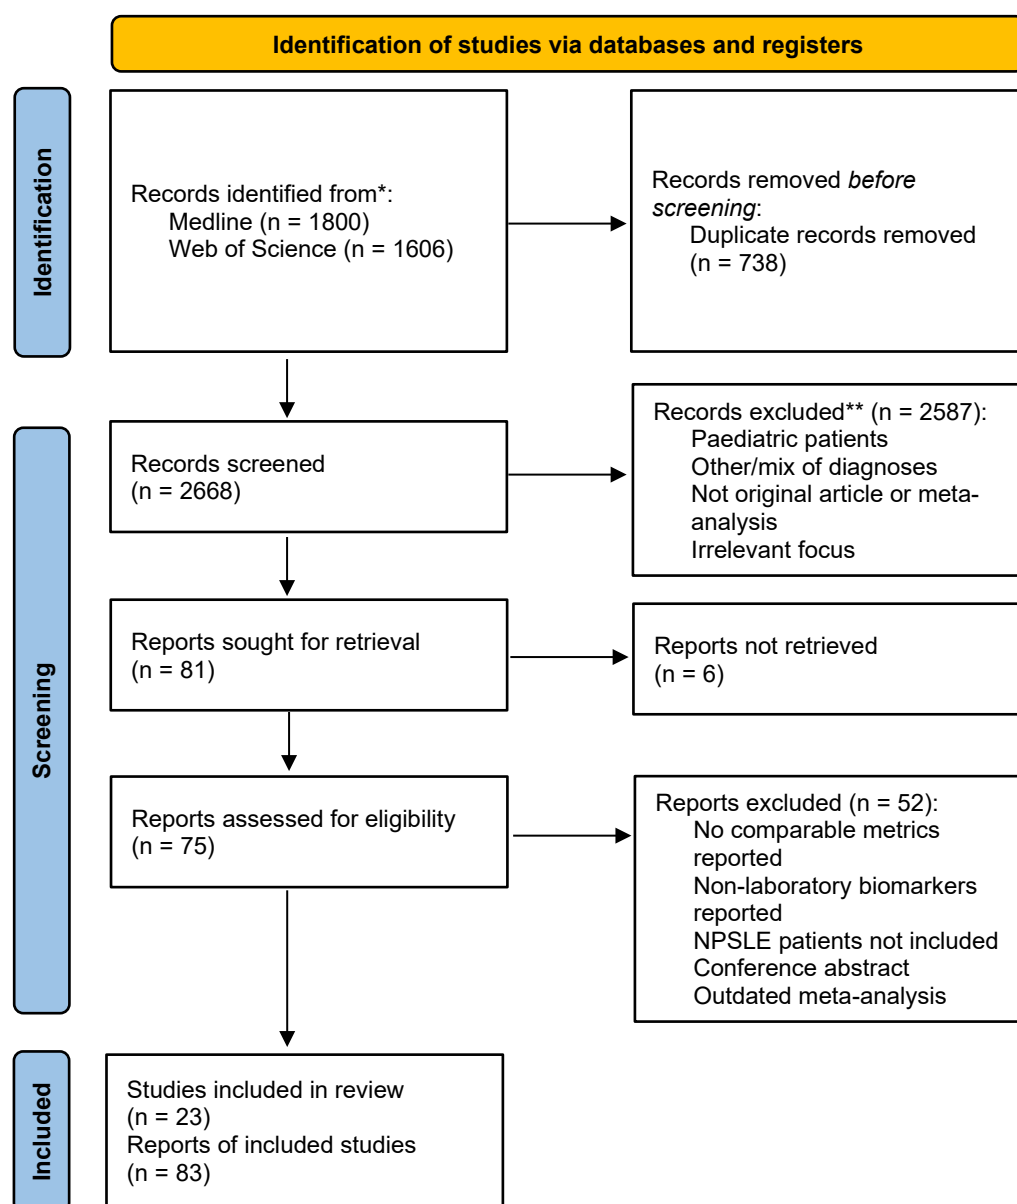

\*Consider, if feasible to do so, reporting the number of records identified from each database or register searched (rather than the total number across all databases/registers).

\*\*If automation tools were used, indicate how many records were excluded by a human and how many were excluded by automation tools.

From: Page MJ, McKenzie JE, Bossuyt PM, Boutron I, Hoffmann TC, Mulrow CD, et al. The PRISMA 2020 statement: an updated guideline for reporting systematic reviews. *BMJ* 2021;372:n71. doi: 10.1136/bmj.n71

For more information, visit: <http://www.prisma-statement.org/>

1. Different templates are available depending on the type of review (new or updated) and sources used to identify studies. For more information visit: <http://prisma-statement.org/prismastatement/flowdiagram.aspx>
