# Supplementary material for: Biomarkers in Neuropsychiatric Systemic Lupus Erythematosus: A Systematic Literature Review of the Last Decade
Source: MDPI journal article supplement (doi:10.3390/brainsci12020192), 2022-01-30
Supplement: s1 [file s1]

**Table S4.** Risk of bias assessment of meta-analyses\*

| Author,<br>year          | Is the<br>review<br>question<br>clearly<br>and<br>explicitly<br>stated? | Were the<br>inclusion<br>criteria<br>appropriate<br>for the<br>review<br>question? | Was the<br>search<br>strategy<br>appropriate? | Were the<br>sources<br>and<br>resources<br>used to<br>search for<br>studies<br>adequate? | Were the<br>criteria for<br>appraising<br>studies<br>appropriate<br>? | Was critical<br>appraisal<br>conducted by<br>two or more<br>reviewers<br>independently? | Were<br>there<br>methods<br>to<br>minimize<br>errors in<br>data<br>extraction<br>? | Were the<br>methods<br>used to<br>combine<br>studies<br>appropriate? | Was the<br>likelihood<br>of<br>publication<br>bias<br>assessed? | Were<br>recommendations<br>for policy and/or<br>practice supported<br>by the reported<br>data? | Were the<br>specific<br>directives<br>for new<br>research<br>appropriate<br>? |
|--------------------------|-------------------------------------------------------------------------|------------------------------------------------------------------------------------|-----------------------------------------------|------------------------------------------------------------------------------------------|-----------------------------------------------------------------------|-----------------------------------------------------------------------------------------|------------------------------------------------------------------------------------|----------------------------------------------------------------------|-----------------------------------------------------------------|------------------------------------------------------------------------------------------------|-------------------------------------------------------------------------------|
| Choi et al.,<br>2020 (1) | Yes                                                                     | Yes                                                                                | Yes                                           | Yes                                                                                      | Yes                                                                   | Yes                                                                                     | Yes                                                                                | Yes                                                                  | Yes                                                             | Yes                                                                                            | Yes                                                                           |

\* Assessed by Joanna Briggs Institute (JBI) Critical Appraisal Checklist for Systematic Reviews and Research Syntheses (2).

## References

1. Choi MY, FitzPatrick RD, Buhler K, Mahler M, Fritzler MJ. A review and meta-analysis of anti-ribosomal P autoantibodies in systemic lupus erythematosus. *Autoimmun Rev.* 2020;19(3):102463.
2. JBI Critical Appraisal Tools. Available online: <https://jbi.global/critical-appraisal-tools> (accessed on 19 January 2021).
