# Supplementary material for: Biomarkers in Neuropsychiatric Systemic Lupus Erythematosus: A Systematic Literature Review of the Last Decade
Source: Brain Sci. 2022 Jan 30;12(2):192. doi: 10.3390/brainsci12020192 (PMC8869794; doi:10.3390/brainsci12020192)
Supplement: Supplementary file 1 [file brainsci-12-00192-s001.zip]

Archive with 12 entries (12 files):
- Figure S1_revised_clean.pdf
- __MACOSX/._Figure S1_revised_clean.pdf
- Table S1.pdf
- __MACOSX/._Table S1.pdf
- Table S2.pdf
- __MACOSX/._Table S2.pdf
- Table S3.pdf
- __MACOSX/._Table S3.pdf
- Table S4.pdf
- __MACOSX/._Table S4.pdf
- Table S5.pdf
- __MACOSX/._Table S5.pdf
